**Title:** Maternity and family leave experiences among female ophthalmologists

**Authors:** Caroline M. Daly, BS<sup>1</sup>, Courtney L. Kraus, MD<sup>1</sup>, Ashley A. Campbell, MD<sup>1</sup>, Mona A. Kaleem, MD<sup>1</sup>, Aakriti Garg Shukla<sup>2</sup>, MD, and Elyse J. McGlumphy, MD<sup>1</sup>

**Affiliations:** <sup>1</sup>Wilmer Eye Institute, Johns Hopkins University School of Medicine, Baltimore, Maryland, USA  
<sup>2</sup>Edward S. Harkness Eye Institute, Columbia University, New York, New York, USA

**\*Corresponding author:** Elyse Joelle McGlumphy MD  
Wilmer Eye Institute  
Johns Hopkins University School of Medicine  
600 N Wolfe Street, Maumenee B-110  
Baltimore, Maryland, USA 21287  
Tel: 443-866-4640; Fax 410-955-1985  
Email: [emcglum1@jh.edu](mailto:emcglum1@jh.edu)

**Objective:** To evaluate family and maternity leave policies and examine the social and professional impacts on female ophthalmologists

**Participants:** Participants were recruited through the Women in Ophthalmology online list-serv to complete a survey evaluating maternity leave policies and their impacts. Survey questions were repeated for each birth event after medical school for up to five birth events.

**Results:** The survey was accessed 198 times, and 169 responses were unique. Most participants were practicing ophthalmologists (92.3%), with a minority in residency (5.3%), in fellowship (1.2%), on disability/leave (0.6%), or retired (0.6%). Most participants (78.3%) were within their first ten years of practice. Experiences were recorded for each leave event, with 169 responses for the first leave, 120 for the second, 28 for the third, and 2 for the fourth. Nearly half of participants reported the information they received about maternity leave to be somewhat or extremely inadequate (first: 49.7%; second: 42.1%; third: 40.9%). Many reported a greater sense of burnout after returning to work (first: 60.9%, second: 58.3%, third: 45.5%). A minority of participants received full pay during the first through third maternity leave events, 39%, 27%, and 33%, respectively. About a third of participants reported being somewhat or very dissatisfied with their maternity leave experience (first: 42.3%, second: 35.0%; third: 27.3%).

**Conclusions:** Female ophthalmologists have varying experiences with maternity leave, but many encounter similar challenges. This study demonstrates that many women receive inadequate information about family leave, desire more weeks of leave, experience a wide variation in pay practices, and lack support for breastfeeding. Understanding the shared experiences of women in ophthalmology identifies areas where improvements are needed in maternity leave practices within the field to create a more supportive environment for physician mothers.

1 Burnout and dissatisfaction are prevalent among women in medicine and have been  
2 associated with demanding work obligations and lack of support in achieving work-life  
3 balance.(1,2) Family planning imposes additional stressors since most female physicians spend  
4 years of peak fertility in medical training and early practice. Family leave policies and  
5 compensation related to family leave vary significantly among medical specialties and  
6 institutions, and the amount of financial and social support new mothers receive is subject to  
7 differing institutional policies and attitudes.(3) Among female ophthalmology residents,  
8 maternity leave is often facilitated by utilizing vacation time. Leave affects surgical training and  
9 research for residents, and many residents report negative feedback or actions from co-residents,  
10 attendings, and program directors for time taken for leave.(4)

11 Family and maternity leave policies play a vital role in the psychological and physical  
12 well-being of mothers and their children. Paid maternity leave has been associated with  
13 decreased rates of postpartum depression, infant mortality, and readmission to the hospital for  
14 infants and mothers as well as improved attachment of infants to mothers and increased pediatric  
15 visit attendance.(5) Paid maternity leave and duration of maternity leave have also been  
16 associated with increased duration of breastfeeding.(5,6) Thus, in addition to addressing some of  
17 the stressors faced by female physicians, adequate maternity leave and benefits may play an  
18 important role in supporting a healthy and happy start for both mothers and infants.

19 Family and maternity leave policies are particularly important in ophthalmology because  
20 the percentage of female ophthalmologists is increasing.(7) Despite this growth, women continue  
21 to be underrepresented among both ophthalmology residents and practicing ophthalmologists.(8)  
22 Better understanding the challenges female ophthalmologists face following birth or adoption  
23 lays a foundation for an institutional framework that more effectively supports and sustains this

24 group. Our study aims to evaluate family and maternity leave experiences among female  
25 ophthalmologists and examine the social and psychological impacts of these practices.

26 Methods:

27 We conducted a cross-sectional study of female ophthalmologists in the United States who  
28 reported utilizing maternity or family leave during their career. The study survey was designed to  
29 assess family and maternity leave practices as well as the social and professional impact of these  
30 practices on females in ophthalmology. The Johns Hopkins Institutional Review Board approved  
31 this study, which adhered to the tenets of the Declaration of Helsinki. Informed consent was not  
32 obtained for this study as no identifiable information was collected from participants.

33 Participants were recruited for the study through Women in Ophthalmology online forum as  
34 well as an ophthalmology mothers group using a voluntary and anonymous survey link. The  
35 inclusion criteria were women who were currently or previously practicing ophthalmology who  
36 reported utilizing family or maternity leave for the birth or adoption of a child in the years  
37 following graduation from medical school. The survey was accessible from May 12, 2022- June  
38 12, 2022.

39 The survey was created and administered using Qualtrics © software (Qualtrics, Provo,  
40 UT). It contained a set of initial questions regarding current professional position, history of  
41 practice, number of birth or adoption events, and impact of career on family planning. The  
42 survey included 30 questions concerning each birth or adoption event after medical school, for  
43 up to five events, including family and maternity leave benefits, financial impacts, breastfeeding,  
44 social support, and satisfaction. Survey questions were structured as yes/no, multiple choice, or  
45 short answer. A final free response question was included for participants to share any other  
46 comments about their family and maternity leave experiences.

47 Descriptive statistics, including frequencies and percentages, were used to characterize the  
48 study participants and their experiences with family and maternity leave.

49 Results:

50 Recruitment

51 The survey link was accessed a total of 198 times; 5 individuals were excluded by failing  
52 to meet inclusion criteria. In the remaining 193 surveys, 12 surveys were excluded due to the  
53 inability to verify a unique participant through a duplicate IP address. Lastly, 12 surveys were  
54 excluded due to incomplete data in which participants failed to answer any questions after the  
55 screening questions. A flowchart of recruitment can be visualized in figure 1.

56 Figure 1: Flowchart showing included and excluded survey participants and reasons for  
57 exclusion.

58 Participants

59 Details on participants are presented in table 1. The majority of participants were  
60 currently practicing (156/169 [92.3%]), with a minority in ophthalmology residency (9/169  
61 [5.3%]), ophthalmology subspecialty fellowship (2/169 [1.2%]), ophthalmologists currently on  
62 disability/leave (1/169 [0.6%]), and retired ophthalmologists (1/169 [0.6%]). Participants  
63 averaged 8.2 years (SD 6.2, Range 0-36) in practice. Most participants (123/157 [78.3%]) were  
64 within their first ten years of practice. Experiences were recorded for each leave event, with 169  
65 responses for the first leave, 120 for the second, 28 for the third, and 2 or the fourth. No  
66 participants reported more than 4 leave events. No adoptions were reported. Over half of  
67 participants reported that someone recommended they delay family planning at some point in  
68 their career (95/169 [56.2%]). A majority of participants felt that their career probably or

69 definitely impacted their family planning (141/169 [83.4%]). Detailed characteristics can be  
 70 found in table 1.

71 Table 1. Baseline characteristics of survey participants

| No.                                     | N (%)                               |                 |
|-----------------------------------------|-------------------------------------|-----------------|
|                                         | 169                                 |                 |
| Current Position                        | Ophthalmology Resident              | 9 (0.05)        |
|                                         | Ophthalmology Fellow                | 2 (0.01)        |
|                                         | Practicing Ophthalmologist          | 156 (0.92)      |
|                                         | Ophthalmologist on Leave/Disability | 1 (0.006)       |
|                                         | Retired Ophthalmologist             | 1 (0.006)       |
|                                         | Other                               | -               |
| Years in Practice                       | Mean (SD, Range)                    | 8.2 (6.2, 0-36) |
|                                         | 0-5                                 | 62 (0.39)       |
|                                         | 6-10                                | 61 (0.39)       |
|                                         | 11-15                               | 19 (0.12)       |
|                                         | 16-20                               | 8 (0.05)        |
|                                         | >20                                 | 7 (0.04)        |
| Mean Hours Worked                       | <20                                 | 1 (0.006)       |
|                                         | 20-40                               | 68 (0.40)       |
|                                         | 41-60                               | 87 (0.51)       |
|                                         | 61-80                               | 12 (0.07)       |
|                                         | >80                                 | 1 (0.006)       |
| Number of Maternity/Family Leave Events | 1                                   | 49              |
|                                         | 2                                   | 92              |
|                                         | 3                                   | 26              |
|                                         | 4                                   | 2               |
|                                         | 5                                   | 0               |
| Current Specialty                       | Resident/fellow                     | 10 (0.06)       |
|                                         | Comprehensive                       | 39 (0.23)       |
|                                         | Glaucoma                            | 31 (0.18)       |
|                                         | Cornea                              | 22 (0.13)       |
|                                         | Retina                              | 19 (0.11)       |
|                                         | Medical Retina                      | 5 (0.03)        |
|                                         | Pediatrics                          | 19 (0.11)       |
|                                         | Neuro-ophthalmology                 | 1 (0.006)       |
|                                         | Oculoplastics                       | 13 (0.08)       |
| Uveitis                                 | 4 (0.02)                            |                 |

|          |          |
|----------|----------|
| Multiple | 5 (0.03) |
| Other    | 2 (0.01) |

72  
73

#### 74 Family Leave and Return to Work Experiences

75 Characterization of family and maternity leave policies and pay are classified by birth  
76 event in Table 2. Less than half of women reported that their workplace had a maternity leave  
77 policy (first: 67/158 [42.4%]; second: 49/106 [46.2%]; third: 9/22 [40.9%]; fourth: 0/2 [0%]),  
78 and nearly half of participants found the information they received about maternity leave to be  
79 somewhat or extremely inadequate (first: 79/159 [49.7%]; second: 45/107 [42.1%]; third: 9/22  
80 [40.9%]). Across all birth events, the average number of weeks desired for leave was 12-13  
81 weeks (average [range] first: 13.2 [3-52], second: 12.7 [4-28], third: 12 [3-20], fourth: 15), which  
82 was greater than the average number of weeks taken for all leave events (first: 8.6 [0-26],  
83 second: 9.9 [2-28], third: 11.1 [3-40], and fourth: 6). Maternity/family leave days came from a  
84 variety of sources, primarily vacation days (first: 92/169 [54.4%], second: 47/105 [44.8%], third:  
85 11/22 [50%]) and sick leave (first: 58/169 [34.3%], second: 36/105 [34.3%], third: 6/22  
86 [27.3%]). A minority of participants received full pay during the first through third maternity  
87 leave events, 39%, 27%, and 33%, respectively. However, most reported no financial hardship  
88 during this time (first: 63/93 [67.7%], second: 23/44 [52.3%], third: 5/6 [83.3%]). When  
89 applicable, a majority of participants did report a sizeable reduction in their clinical production  
90 bonus with first and second leave (first: 58/78 [74.4%], second: 59/77 [76.6%], third: 4/19  
91 [21.1%]). Additional details can be found in table 2.

92 Table 2. Family and maternity leave policies and pay

|                   | Leave 1           | Leave 2           | Leave 3         |
|-------------------|-------------------|-------------------|-----------------|
| N                 | 165               | 107               | 21              |
| Age Y (SD, Range) | 32.6 (3.0, 26-44) | 34.8 (2.7, 29-44) | 37 (1.7, 34-42) |

|                                                                                                |                           |                   |                   |                   |
|------------------------------------------------------------------------------------------------|---------------------------|-------------------|-------------------|-------------------|
| Pregnancy without intervention                                                                 |                           | 133               | 94                | 19                |
| Pregnancy with intervention                                                                    |                           | 32                | 13                | 2                 |
| If applicable, support for fertility appointments and procedures                               | Extremely inadequate      | 9 (0.3)           | 2 (0.15)          | 1 (0.5)           |
|                                                                                                | Somewhat inadequate       | 3 (0.1)           | 1 (0.08)          | 0                 |
|                                                                                                | Neutral                   | 8 (0.27)          | 8 (0.62)          | 1 (0.5)           |
|                                                                                                | Mostly adequate           | 9 (0.3)           | 2 (0.15)          | 0                 |
|                                                                                                | Extremely adequate        | 1 (0.03)          | 0                 | 0                 |
| Adoption                                                                                       |                           | 0                 | 0                 | 0                 |
| Practice Setting                                                                               | Resident/Fellow           | 39 (0.25)         | 7 (0.07)          | 0                 |
|                                                                                                | Solo practice             | 16 (0.1)          | 4 (0.04)          | 0                 |
|                                                                                                | PP ≤5 physicians          | 3 (0.02)          | 5 (0.05)          | 1 (0.05)          |
|                                                                                                | PP >5 physicians          | 36 (0.23)         | 36 (0.34)         | 7 (0.32)          |
|                                                                                                | Hospital based practice   | 17 (0.11)         | 13 (0.12)         | 3 (0.14)          |
|                                                                                                | Academic practice         | 10 (0.06)         | 8 (0.08)          | 2 (0.09)          |
|                                                                                                | Private equity group      | 37 (0.23)         | 32 (0.3)          | 9 (0.41)          |
| Did your workplace have a maternity leave policy?                                              | Yes                       | 67 (0.42)         | 49 (0.46)         | 9 (0.41)          |
|                                                                                                | No                        | 79 (0.50)         | 52 (0.49)         | 13 (0.59)         |
|                                                                                                | Unsure                    | 12 (0.08)         | 5 (0.05)          | 0                 |
| Provided with adequate information about family/maternity leave and was it easy to understand? | Extremely inadequate      | 48 (0.3)          | 25 (0.23)         | 6 (0.27)          |
|                                                                                                | Somewhat inadequate       | 31 (0.19)         | 20 (0.19)         | 3 (0.14)          |
|                                                                                                | Neutral                   | 24 (0.15)         | 19 (0.18)         | 4 (0.18)          |
|                                                                                                | Somewhat adequate         | 33 (0.21)         | 20 (0.19)         | 4 (0.18)          |
|                                                                                                | Extremely adequate        | 23 (0.14)         | 23 (0.21)         | 5 (0.23)          |
| Weeks Mean (SD) (Range)                                                                        |                           |                   |                   |                   |
|                                                                                                | Weeks of leave available  | 7.28 (4.5) (0-24) | 8.57 (5.0) (0-24) | 10.6 (6.2) (0-24) |
|                                                                                                | Weeks of leave taken      | 8.6 (4.0) (0-26)  | 9.9 (4.2) (2-28)  | 11.1 (7.6) (3-40) |
|                                                                                                | Weeks of leave desired    | 13.2 (5.6) (3-52) | 12.7 (4.3) (4-28) | 12 (3.4) (3-20)   |
| Source of leave                                                                                |                           |                   |                   |                   |
|                                                                                                | Sick leave                | 58 (0.34)         | 36 (0.34)         | 6 (0.27)          |
|                                                                                                | Vacation                  | 92 (0.54)         | 47 (0.45)         | 11 (0.5)          |
|                                                                                                | Paid time off             | 35 (0.21)         | 24 (0.23)         | 6 (0.27)          |
|                                                                                                | Specified maternity leave | 52 (0.31)         | 32 (0.30)         | 8 (0.36)          |
|                                                                                                | Other                     | 57 (0.34)         | 42 (0.40)         | 6 (0.27)          |
| Pay                                                                                            |                           |                   |                   |                   |
|                                                                                                | No pay                    | 43 (0.27)         | 27 (0.43)         | 2 (0.22)          |
|                                                                                                | Partial pay               | 37 (0.23)         | 17 (0.27)         | 4 (0.44)          |
|                                                                                                | Full pay                  | 62 (0.39)         | 17 (0.27)         | 3 (0.33)          |



|                                                |                        |            |           |           |
|------------------------------------------------|------------------------|------------|-----------|-----------|
|                                                | Unable to recall/other | 18 (0.11)  | 2 (0.03)  | -         |
| Financial hardship during leave                | No                     | 63 (0.68)  | 23 (0.52) | 5 (0.83)  |
|                                                | Yes                    | 27 (0.29)  | 21 (0.48) | 1 (0.17)  |
| Sizable reduction in clinical production bonus | No                     | 20 (0.26)  | 18 (0.23) | 4 (0.21)  |
|                                                | Yes                    | 58 (0.74)  | 59 (0.77) | 15 (0.79) |
| Subsequent reduction in work hours upon return | No                     | 112 (0.72) | 84 (0.79) | 20 (0.95) |
|                                                | Yes                    | 23 (0.14)  | 19 (0.09) | 1 (0.05)  |
|                                                | NA                     | 22 (0.14)  | 12 (0.11) | 0         |

93

94

Family and maternity leave support experiences are detailed in Table 3.

95

Participants experienced pressure to answer emails and calls (first: 27.8%, second: 25.8%, third:

96

25.9%), continued academic expectations (first: 29%, second: 19.2%, third: 18.5%), and pressure

97

to return to work early (first: 29.6%, second: 18.3%, third: 22.2%). Less frequently but still

98

notably, participants experienced derogatory comments by colleagues and staff (first: 23.1%,

99

second: 10%, third: 25.9%), financial pressures from coworkers or their institution (first: 18.9%,

100

second: 17.5%, third: 22.2%), and anger from patients (first: 13.6%, second: 13.3%, third:

101

14.8%). Nearly half of participants had partners who took leave (first: 73/144 [50.7%], second:

102

45/96 [46.9%], third: 11/20 [55%]). Most participants felt supported by their colleagues and

103

administration during leaves and upon return to work (first: 116/156 [74.4%], second: 84/104

104

[80.8%], third: 15/22 [68.2%]); however, a majority experienced a greater sense of burnout with

105

return to work for the first and second leave experiences (first: 95/156 [60.9%], second: 60/103

106

[58.3%], third: 10/22 [45.5%]). Post-partum depression, anxiety, obsessive compulsive disorder,

107

or other mental health disorders in the post-partum period were experienced by over a quarter of

108

women during their first leave experience (first: 44/156 [28.2%], second: 13/103 [12.6%], third:

109 1/22 [4.5%]). Overall, about a third of participants reported being somewhat or very dissatisfied  
 110 with their maternity leave experience (first: 66/156 [42.3%], second: 36/103 [35%]; third: 6/22  
 111 [27.3%]).

112 Table 3. Family and maternity leave support experiences

|                                                                                                                                                 |                                                            | First      | Second    | Third     |
|-------------------------------------------------------------------------------------------------------------------------------------------------|------------------------------------------------------------|------------|-----------|-----------|
| Did you feel supported by colleagues and admin during leave and upon return to work?                                                            | Definitely yes                                             | 57 (0.37)  | 50 (0.48) | 9 (0.41)  |
|                                                                                                                                                 | Probably yes                                               | 59 (0.38)  | 34 (0.33) | 6 (0.27)  |
|                                                                                                                                                 | Probably not                                               | 24 (0.15)  | 12 (0.12) | 4 (0.18)  |
|                                                                                                                                                 | Definitely not                                             | 16 (0.10)  | 8 (0.08)  | 3 (0.14)  |
| Did you consider leaving your job after the birth of your child?                                                                                | Yes                                                        | 35 (0.22)  | 16 (0.15) | 4 (0.18)  |
|                                                                                                                                                 | No                                                         | 116 (0.74) | 84 (0.81) | 17 (0.77) |
|                                                                                                                                                 | I did leave                                                | 4 (0.03)   | 4 (0.04)  | 1 (0.05)  |
|                                                                                                                                                 | Unable to recall                                           | 1 (0.006)  | 0         | 0         |
| Did you suffer with post-partum depression, anxiety, obsessive compulsive disorder, or other mental health disorders in the post-partum period? | Yes                                                        | 44 (0.28)  | 13 (0.13) | 1 (0.05)  |
|                                                                                                                                                 | Maybe                                                      | 19 (0.12)  | 10 (0.1)  | 3 (0.14)  |
|                                                                                                                                                 | No                                                         | 93 (0.60)  | 80 (0.78) | 18 (0.82) |
| Childcare                                                                                                                                       | Nanny/Home                                                 | 74 (0.47)  | 57 (0.55) | 14 (0.64) |
|                                                                                                                                                 | Relative/Family                                            | 32 (0.21)  | 7 (0.07)  | 1 (0.05)  |
|                                                                                                                                                 | Daycare                                                    | 36 (0.23)  | 28 (0.27) | 5 (0.23)  |
|                                                                                                                                                 | Stay at home spouse                                        | 8 (0.05)   | 8 (0.08)  | 0         |
|                                                                                                                                                 | I stayed at home                                           | 2 (0.01)   | 1 (0.01)  | 1 (0.05)  |
|                                                                                                                                                 | Other                                                      | 4 (0.03)   | 3 (0.03)  | 1 (0.05)  |
| Did you feel a greater sense of burnout with return to work?                                                                                    | Yes                                                        | 95 (0.61)  | 60 (0.58) | 10 (0.45) |
|                                                                                                                                                 | Maybe                                                      | 30 (0.19)  | 14 (0.14) | 3 (0.14)  |
|                                                                                                                                                 | No                                                         | 31 (0.2)   | 29 (0.28) | 9 (0.41)  |
| Participants reported experiencing:                                                                                                             |                                                            |            |           |           |
|                                                                                                                                                 | Derogatory comments by colleagues or staff                 | 0.23       | 0.10      | 0.26      |
|                                                                                                                                                 | Financial pressure from coworkers/institution              | 0.19       | 0.18      | 0.22      |
|                                                                                                                                                 | Termination from position                                  | 0.04       | 0.03      | 0.04      |
|                                                                                                                                                 | Delay in partnership                                       | 0.08       | 0.08      | 0.07      |
|                                                                                                                                                 | Anger from patients for rescheduled visits etc             | 0.14       | 0.13      | 0.15      |
|                                                                                                                                                 | Continued pressure to answer emails/calls                  | 0.28       | 0.26      | 0.26      |
|                                                                                                                                                 | Continued expectation to participate in academic endeavors | 0.29       | 0.19      | 0.19      |

|                                                 |                                   | Pressure to return early | 0.30      | 0.18      | 0.22      |
|-------------------------------------------------|-----------------------------------|--------------------------|-----------|-----------|-----------|
| Did circumstances impact future family planning | Definitely yes                    |                          | 33 (0.21) | 24 (0.23) | 7 (0.32)  |
|                                                 | Probably yes                      |                          | 26 (0.17) | 11 (0.11) | 0         |
|                                                 | Might or might not                |                          | 21 (0.13) | 8 (0.08)  | 1 (0.05)  |
|                                                 | Probably not                      |                          | 42 (0.27) | 29 (0.28) | 7 (0.32)  |
|                                                 | Definitely not                    |                          | 34 (0.22) | 31 (0.3)  | 7 (0.32)  |
| Did your partner take leave                     | Yes                               |                          | 73 (0.51) | 45 (0.47) | 11 (0.55) |
|                                                 | No                                |                          | 71 (0.49) | 51 (0.53) | 9 (0.45)  |
| Overall level of satisfaction                   | Very unsatisfied                  |                          | 37 (0.24) | 17 (0.17) | 3 (0.14)  |
|                                                 | Somewhat unsatisfied              |                          | 29 (0.19) | 19 (0.18) | 3 (0.14)  |
|                                                 | Neither satisfied nor unsatisfied |                          | 18 (0.12) | 12 (0.12) | 4 (0.18)  |
|                                                 | Somewhat satisfied                |                          | 45 (0.29) | 33 (0.32) | 4 (0.18)  |
|                                                 | Very satisfied                    |                          | 27 (0.17) | 22 (0.21) | 8 (0.36)  |

113

114

Most participants reported breastfeeding (first: 139/157 [88.5%], second: 96/106

115

[90.6%], third: 20/22 [90.9%]; Table 4). Of those who breastfed, over a quarter reported their

116

employer provided slightly, moderately, or extremely inadequate time for milk expression (first:

117

48/131 [36.6%], second: 22/87 [25.2%], third: 8/20 [40%]) and a smaller percentage were made

118

to feel guilty for time missed during milk expression (first: 37/130 [28.5%], second: 16/89

119

[18%], third: 3/20 [15%]).

120

Table 4. Breastfeeding experiences reported during family and maternity leave events

|                                                              |                       | First      | Second    | Third     |
|--------------------------------------------------------------|-----------------------|------------|-----------|-----------|
| Breastfeeding                                                | Yes                   | 139 (0.89) | 96 (0.91) | 20 (0.91) |
|                                                              | Unable                | 13 (0.08)  | 7 (0.07)  | 0         |
|                                                              | No                    | 5 (0.03)   | 3 (0.03)  | 2 (0.09)  |
| Did your employer provide adequate time for milk expression? | Extremely inadequate  | 16 (0.12)  | 6 (0.07)  | 3 (0.15)  |
|                                                              | Moderately inadequate | 22 (0.17)  | 10 (0.11) | 4 (0.2)   |
|                                                              | Slightly inadequate   | 10 (0.08)  | 6 (0.07)  | 1 (0.05)  |
|                                                              | Neutral               | 11 (0.08)  | 8 (0.09)  | 4 (0.2)   |
|                                                              | Slightly adequate     | 8 (0.06)   | 11 (0.13) | 1 (0.05)  |
|                                                              | Moderately adequate   | 37 (0.28)  | 21 (0.24) | 3 (0.15)  |
|                                                              | Extremely adequate    | 27 (0.21)  | 25 (0.29) | 4 (0.2)   |

|                                                                      |       |           |           |          |
|----------------------------------------------------------------------|-------|-----------|-----------|----------|
| Were you made to feel guilty for time missed during milk expression? | Yes   | 37 (0.28) | 16 (0.18) | 3 (0.15) |
|                                                                      | Maybe | 18 (0.14) | 18 (0.2)  | 5 (0.25) |
|                                                                      | No    | 75 (0.58) | 55 (0.62) | 12 (0.6) |
| Do you feel your job impacted breastfeeding in a negative way?       | Yes   | 62 (0.47) | 24 (0.28) | 7 (0.35) |
|                                                                      | Maybe | 19 (0.14) | 21 (0.24) | 3 (0.15) |
|                                                                      | No    | 52 (0.39) | 42 (0.48) | 10 (0.5) |

121

122 Discussion:

123 Our study is the first to examine family leave experiences among female  
 124 ophthalmologists and the impact on their personal and professional lives. Nearly 80% of study  
 125 participants were in their first ten years of practice and represented currently practicing physician  
 126 mothers. Half of participants reported receiving inadequate information about leave and no or  
 127 partial pay during leave. Although they felt supported by their colleagues and administration, the  
 128 majority experienced a greater sense of burnout upon returning to work. Our findings identify  
 129 areas of improvement in family leave practices and suggest that female ophthalmologists who  
 130 experience motherhood have shared challenges.

131 Among study participants, over half did not have a maternity leave policy established in  
 132 the workplace, and close to half found information regarding family and maternity leave to be  
 133 inadequate. Lack of clarity surrounding maternity leave policies is also found across other  
 134 medical specialties.(3,9) As some study participants commented, navigating maternity leave can  
 135 be incredibly difficult, especially when one is working in a male-dominated workplace or is the  
 136 first in the workplace to take maternity leave. On average, participants took more leave than was  
 137 available using maternity leave days. However, this amount of time was still less than what  
 138 participants desired to take, a finding which mirrors the experience of physician mothers across

139 specialties.(3) Participants took their leave from multiple sources, including specified maternity  
140 leave days, sick leave, vacation, paid time off, and unpaid time off, which further demonstrates  
141 that specified maternity leave days alone were inadequate. Notably, over half of participants  
142 utilized vacation days for maternity leave. Vacation days are meant for rest and recuperation  
143 from work, but time spent on maternity leave is often far from restful as mothers face the  
144 physical and emotional demands of caring for a newborn, and if applicable, the physical recovery  
145 from the birthing event. These findings suggest that providing more information regarding leave  
146 policies and building in additional time for maternity leave may help female ophthalmologists  
147 feel more supported during and after pregnancy, which may in turn improve experiences of  
148 burnout.

149 Financial hardship during leave was also a significant problem faced by participants, with  
150 nearly a third of women experiencing financial hardships after the birth of their first child and  
151 nearly three quarters of women experiencing a sizeable loss in clinical production bonus after the  
152 birth of their first and second children. Lost income during leave may also not fully capture the  
153 economic impact of family planning. Some may also have to curtail their clinical volume to  
154 allow time for milk expression upon return to work. Twenty-seven percent of participants  
155 reported no paid leave while 23% reported partial paid leave after the birth of their first child.  
156 Furthermore, several participants commented that even after their return from leave, they  
157 struggled for months to rebuild their clinical volume. Female ophthalmologists already face  
158 financial disparities as their median reimbursements remain less than that for males.(10)  
159 Additional financial stressors from maternity leave only add to the inequities for women in the  
160 field. Participants also felt professional stress while on leave, noting most frequently the pressure  
161 to keep up with academic expectations, answer emails and calls, and even return to work early.

162 Some participants experienced derogatory comments from colleagues and administration which  
163 is particularly troublesome in this time of vulnerability. While it is difficult to lessen the financial  
164 burden of parental leave on a small physician group, large physician groups, private equity firms,  
165 and academic institutions should establish a robust system capable of accommodating periods of  
166 leave for medical and family planning purposes. Furthermore, due to the demanding nature of  
167 many physician roles, individuals should be given an appropriate length of time for leave without  
168 undue incentives for early return to encourage proper family bonding, maternal mental and  
169 physical health, and the establishment of lactation if applicable.

170 Return to work, while challenging alone, is further complicated for those who choose to  
171 breastfeed beyond leave. Most participants wished or chose to breastfeed. About half of those  
172 women felt they received adequate time to express milk, reported they were not made to feel  
173 guilty for the time spent expressing milk, and did not feel like their job negatively impacted  
174 breastfeeding, while the other half of women expressed more neutral or negative experiences  
175 with breastfeeding upon return to work. These data show that women in ophthalmology have  
176 varying experiences with breastfeeding and could benefit from standardized protocols to protect  
177 time and space for breastfeeding during the workday. Since lactation support is a legal  
178 requirement and breastfeeding has many positive health benefits for both mother and baby,  
179 support and accommodations for expressing milk should be a priority.(11) Individuals with a  
180 history of lactation have been shown to have a reduced incidence of diabetes mellitus type 2,  
181 breast cancer, and ovarian cancer. Not breastfeeding or early cessation of breastfeeding is  
182 associated with an increased risk of postpartum depression.(12)

183 Many participants experienced postpartum mental health difficulties and even more  
184 reported a greater sense of burnout upon returning from their leave. The rate of postpartum

185 depression or other mental health issues among female ophthalmologists in our study was nearly  
186 30% for the first birth experience, which is over double the national prevalence of postpartum  
187 depression.(13) Burnout is highly prevalent among women in medicine, and the additional  
188 challenge of navigating maternity leave and its associated personal, professional, and financial  
189 facets may contribute further to this problem.(1,2) Although female ophthalmologists are  
190 underrepresented in practice, the number of women entering the field continues to grow.(7,8) In  
191 order to support this growth and protect against increased burnout, we must be attentive to the  
192 challenges female ophthalmologists face, especially surrounding maternity leave, and work  
193 toward creative solutions to more effectively support and empower women during and after the  
194 birth or adoption of a child.

195         Despite many reported difficulties, many participants reported feeling supported by  
196 colleagues and administration both during leave and upon return and about half were somewhat  
197 or very satisfied with their maternity leave experience overall.

198         This study has several potential limitations. This survey represents the experiences of 169  
199 female ophthalmologists and ophthalmologists in training, a small fraction of the eligible  
200 candidates. Our study asked individuals to recollect their prior maternity/family leave  
201 experiences from memory introducing the possibility for recall bias; individuals may fail to  
202 remember previous events or experiences accurately. Fortunately, most participants were in the  
203 first ten years of practice, and one-third in the first 0-5 years of practice, representing those with  
204 recent parental leave experiences. Furthermore, given most participants were within the first ten  
205 years of their career, this study may not accurately represent practices and experiences of late-  
206 career physicians. It is also possible that individuals who had prior experiences with  
207 maternity/family leave that were undesirable may be more likely to take the survey; while many

208 women experienced difficulties during leave, there were also many participants who reported a  
209 positive experience. Lastly, our survey only addresses the experiences of female  
210 ophthalmologists; male ophthalmologists are also subject to similar stressors in family planning  
211 and leave, and additional studies are warranted to further characterize their experience.

212 Overall, this study is the first to bring to light the family and maternity leave experiences of  
213 female ophthalmologists. As the female representation grows in medicine and ophthalmology,  
214 the policies and practices around maternal health and benefits need to reflect the changing  
215 demographic. It is our hope that highlighting the experiences of women across our nation will  
216 serve as a foundation and impetus for standardizing and implementing family and maternal leave  
217 policies which promote infant bonding, lactation, and maternal physical and mental well-being.



1. Clemen NM, Blacker BC, Floen MJ, Schweinle WE, Huber JN. Work-Life Balance in Women Physicians in South Dakota: Results of a State-Wide Assessment Survey. *S D Med*. 2018 Dec;71(12):550–8.
2. Stack SW, McKinney CM, Spiekerman C, Best JA. Childbearing and maternity leave in residency: determinants and well-being outcomes. *Postgrad Med J*. 2018 Dec;94(1118):694–9.
3. Juengst SB, Royston A, Huang I, Wright B. Family Leave and Return-to-Work Experiences of Physician Mothers. *JAMA Netw Open*. 2019 Oct 2;2(10):e1913054.
4. Reilly G, Tipton C, Liberman P, Berkenstock M. Attitudes toward parental leave and breastfeeding during ophthalmology residency. *Can J Ophthalmol*. 2022 Jun;57(3):175–87.
5. Van Niel MS, Bhatia R, Riano NS, de Faria L, Catapano-Friedman L, Ravven S, et al. The Impact of Paid Maternity Leave on the Mental and Physical Health of Mothers and Children: A Review of the Literature and Policy Implications. *Harv Rev Psychiatry*. 2020;28(2):113–26.
6. Navarro-Rosenblatt D, Garmendia M-L. Maternity Leave and Its Impact on Breastfeeding: A Review of the Literature. *Breastfeed Med*. 2018 Nov 1;13(9):589–97.
7. Gill HK, Niederer RL, Shriver EM, Gordon LK, Coleman AL, Danesh-Meyer HV. An Eye on Gender Equality: A Review of the Evolving Role and Representation of Women in Ophthalmology. *Am J Ophthalmol*. 2022 Apr 1;236:232–40.
8. Xierali IM, Nivet MA, Wilson MR. Current and Future Status of Diversity in Ophthalmologist Workforce. *JAMA Ophthalmol*. 2016 Sep 1;134(9):1016–23.
9. MacVane C, Fix M, Strout T, Zimmerman K, Bloch R, Hein C. Congratulations, You're Pregnant! Now About Your Shifts . . . : The State of Maternity Leave Attitudes and Culture in EM [Internet]. Vol. 18, *Western Journal of Emergency Medicine*. 2017. p. 800–10. Available from: <http://dx.doi.org/10.5811/westjem.2017.6.33843>
10. Felfeli T, Canizares M, Jin Y-P, Buys YM. Pay Gap among Female and Male Ophthalmologists Compared with Other Specialties. *Ophthalmology*. 2022 Jan;129(1):111–3.
11. León-Cava, Lutter, Ross. Quantifying the benefits of breastfeeding: a summary of the evidence. *Pan Am Health* [Internet]. Available from: <http://s3.enonline.net/attachments/421/bobcontents-and-introduction-summary.pdf>
12. Ip S, Chung M, Raman G, Chew P, Magula N, DeVine D, et al. Breastfeeding and maternal and infant health outcomes in developed countries. *Evid Rep Technol Assess*. 2007 Apr;(153):1–186.

13. Shorey S, Chee CYI, Ng ED, Chan YH, Tam WWS, Chong YS. Prevalence and incidence of postpartum depression among healthy mothers: A systematic review and meta-analysis. *J Psychiatr Res*. 2018 Sep;104:235–48.

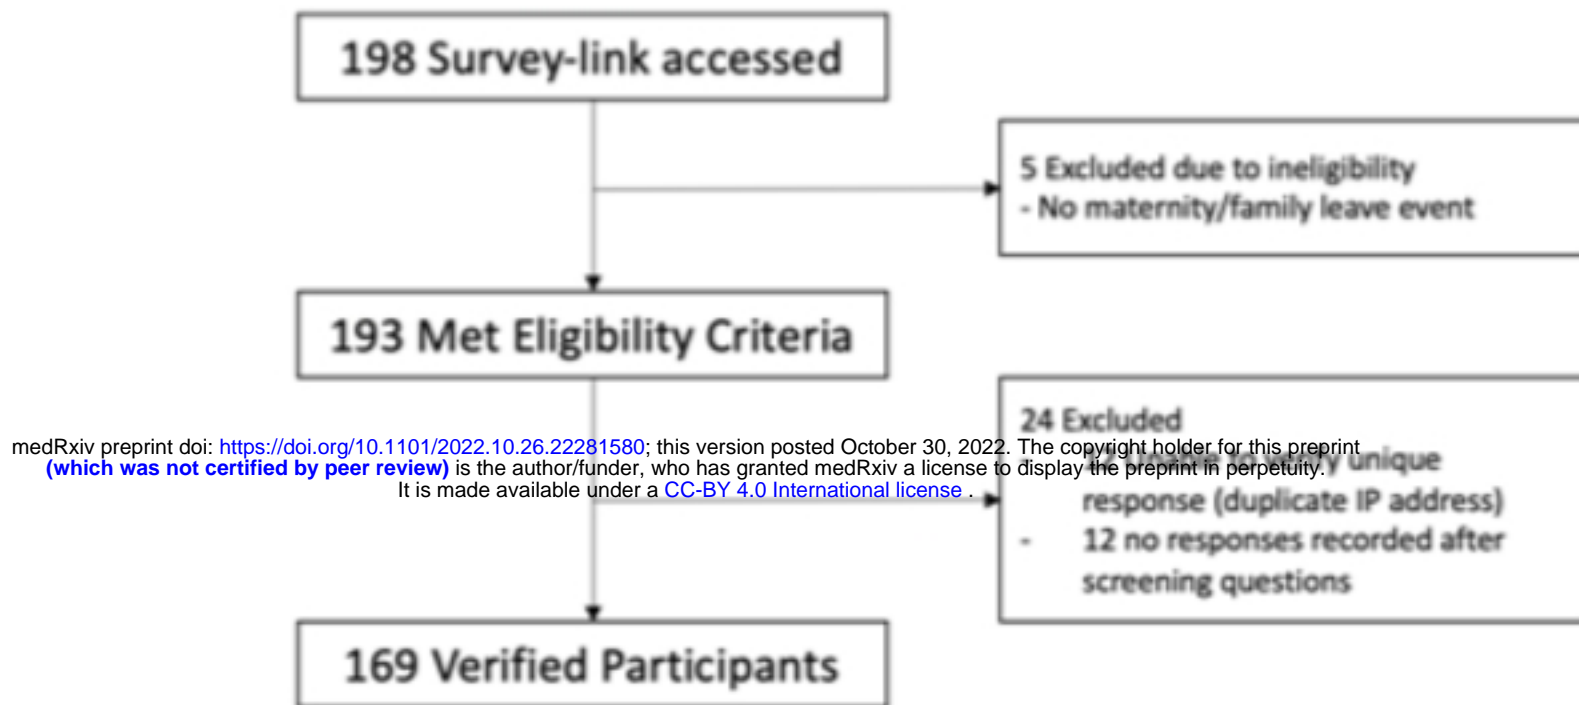

Figure 1
